# Supplementary material for: Quantifying the benefit offered by transcript assembly with Scallop-LR on single-molecule long reads
Source: PubMed Central journal article supplement (PMC6918626; doi:10.1186/s13059-019-1883-0), 2019-12-18
Supplement: 13059_2019_1883_MOESM1_ESM.pdf [file 13059_2019_1883_MOESM1_ESM.pdf]

# Supplementary Materials

## Quantifying the benefit offered by transcript assembly with Scallop-LR on single-molecule long reads

Laura H. Tung<sup>1,2</sup>, Mingfu Shao<sup>3</sup>, and Carl Kingsford<sup>1</sup>

<sup>1</sup>Computational Biology Department, School of Computer Science, Carnegie Mellon University

<sup>2</sup>Joint Carnegie Mellon University-University of Pittsburgh Ph.D. Program in Computational Biology

<sup>3</sup>Department of Computer Science and Engineering, The Pennsylvania State University

### 1. Merging multiple SRA Runs from the same BioSample into one dataset

In most of the PacBio datasets in SRA, one BioSample has multiple SRA Runs. We merge multiple SRA Runs that belong to the same BioSample into one dataset. PacBio sequencing uses the template called SMRTbell that is a closed, single-stranded circular DNA created by ligating adaptors to both ends of a target double-stranded cDNA molecule. The sequencing is based on a SMRT Cell, a chip with consumable substrates comprising arrays of zero-mode waveguide (ZMW) nanostructures, and a SMRTbell diffuses into a sequencing unit ZMW on it. The real-time observation of a SMRT Cell is called a movie, and an SRA Run usually contains one movie and sometimes contains multiple movies. One BioSample has multiple SRA Runs because the experimenters used multiple movies (i.e. multiple SMRT Cells) to increase the coverage so that those low-abundance, long isoforms can be captured in Iso-Seq Analysis, since the “polish” step in Iso-Seq Analysis keeps only the isoforms with at least two full-length reads to support them. In most cases, the experimenters also used a size selection sequencing strategy, that is, isoforms that are in different size ranges are split into separate independent SMRTbell libraries for sequencing, so that larger isoforms are not detrimentally dominated by smaller isoform molecules during the sequencing. Thus, different SRA Runs are designated for different size ranges. Therefore, we use one BioSample instead of one SRA Run to represent one dataset in our analysis, and we merge multiple SRA Runs into that dataset.

### 2. Software versions and options used in the analysis workflow

The software versions and options used in the analysis workflow are summarized in the following:

Iso-Seq Analysis: Iso-Seq2 from SMRT Link v5.1.0.

Minimap2: v2.2. Options: *-ax splice*.

StringTie: v1.3.2d. Options: *-c 1.0*.

Scallop-LR: v0.9.1. Options: *-c <ccs\_read\_info> --min\_num\_hits\_in\_bundle 1*.

Gffcompare: v0.9.9c. Options: *-M -N -r <reference\_annotation>*.

SQANTI: v1.2. Options: *-g*.

rnaQUAST: v1.5.1. Options: *--transcripts <multiple\_assemblies> --reference <reference\_genome> --gene\_db <gene\_database> --gmap\_index <gmap\_index> --labels*

*<labels> --no\_plots --disable\_infer\_genes --disable\_infer\_transcripts --lower\_threshold  
<lower\_threshold> --upper\_threshold <upper\_threshold>.  
Transrate: v1.0.3. Options: --assembly <assembly> --reference <reference\_transcriptome>.*

### **3. Assessment of predicted transcripts that partially match known transcripts in mouse data**

Figures S1, S2, and S3 show box-whisker plots of matched transcripts in matched fraction bins, assembled isoforms in assembled fraction bins, "mean isoform assembly" and "mean fraction of transcript matched" for Scallop-LR, StringTie, and Iso-Seq Analysis on the eight mouse datasets based on rnaQUAST evaluations. Full results are shown in Tables S8.1-S8.8.

In the mouse data, Scallop-LR predicts more transcripts that have a high fraction of their bases matching reference transcripts than Iso-Seq Analysis. From Tables S8.1-S8.8, in the high % bins of the "x-y% matched transcripts" (75-95% and 95-100% matched), Scallop-LR consistently has more x-y% matched transcripts than Iso-Seq Analysis. However, unlike in the human data, Scallop-LR consistently has fewer x-y% matched transcripts than StringTie in the high % bins. These trends are visualized in Figure S1 (75-95% and 95-100% matched bins).

However, on average, Scallop-LR transcripts match reference transcripts better than StringTie transcripts. In Tables S8.1-S8.8, Scallop-LR consistently has much higher values of "Mean fraction of transcript matched" than StringTie. Scallop-LR has slightly lower values than Iso-Seq Analysis though. These trends are visualized in Figure S3 (right: "Mean fraction of transcript matched").

In the mouse data, there are more reference transcripts that have a high fraction of their bases being captured/covered by Scallop-LR transcripts than by Iso-Seq Analysis predicted transcripts. From Tables S8.1-S8.8, in the high % bins of the "x-y% assembled isoforms" (75-95% and 95-100% assembled), Scallop-LR consistently has more x-y% assembled isoforms than Iso-Seq Analysis. However, Scallop-LR consistently has fewer x-y% assembled isoforms than StringTie in the high % bins. These trends are visualized in Figure S2 (75-95% and 95-100% assembled bins).

However, on average, reference transcripts are better captured/covered by Scallop-LR transcripts than by StringTie transcripts and Iso-Seq Analysis transcripts. In Tables S8.1-S8.8, Scallop-LR consistently has higher values of "Mean isoform assembly" than both StringTie and Iso-Seq Analysis. Iso-Seq Analysis consistently has higher values than StringTie. This trend is visualized in Figure S3 (left: "Mean isoform assembly").

The quality of StringTie transcripts in the mouse data is somewhat improved compared to that in the human data. As in the human data, StringTie consistently has significantly more unannotated transcripts than both Scallop-LR and Iso-Seq Analysis (Tables S8.1-S8.8). However, in Figure S1, unlike Figure 7, in the 0-50% matched bin StringTie no longer has a very high number of transcripts. This indicates that StringTie performs better in the mouse data than in the human data. In Figure S2, though, in the 0-50% assembled bin StringTie still has significantly higher numbers of isoforms than both Scallop-LR and Iso-Seq Analysis, similar to Figure 8.

## 4. Evaluation of Scallop-LR and StringTie on simulated human data

We evaluated Scallop-LR and StringTie on a simulated human dataset (Liu *et al.*, 2019). The transcriptome that was used to generate the simulated long reads originated from the Ensembl annotation *Homo sapiens* GRCh38.94 and was a subset of the transcripts in this Ensembl annotation, by removing unfinished scaffolds, transcripts shorter than 200 bp, annotations with an unknown reference, etc. and randomly selecting alternative-splicing genes, single-splicing genes, and genes with small exons (< 31bp). The PacBio PBSIM tool was used to generate the simulated CCS reads from this transcriptome. The simulation was model-based using the CCS model, and three runs of simulations were performed by using three different sequencing depths 4X, 10X and 30X respectively. We merged the CCS reads generated with the three sequencing depths together to obtain this simulated human dataset. We used the transcripts in the transcriptome sequences that were used to generate the simulated CCS reads to extract the transcripts' records and their corresponding genes' records from the Ensembl annotation *Homo sapiens* GRCh38.94 to obtain an annotation GTF file. This extracted annotation GTF file serves as the "ground truth" and contains 7810 multi-exon transcripts.

In the Gffcompare evaluation, the extracted annotation GTF file corresponding to the transcriptome that was used to generate the simulated CCS reads serves as the reference annotation. Scallop-LR demonstrates both higher sensitivity and higher precision than StringTie (Table S12), consistent with the trends on the real human datasets. Note that since the simulated CCS reads do not contain the primer information, Scallop-LR's transcript boundary identification algorithm through extracting the boundary information from long reads is not used on the simulated data.

In the rnaQUAST evaluation, the extracted annotation GTF file corresponding to the transcriptome that was used to generate the simulated CCS reads is used to make the gene annotation database. Therefore, the metric "x-y% assembled isoforms" is computed relative to the initial set of expressed isoforms that was used to generate the simulated reads, rather than all known isoforms. StringTie has more "x-y% assembled isoforms" in the 95-100% bin than Scallop-LR (Table S13), consistent with the trend on the majority of the real human datasets. However, Scallop-LR has more "x-y% assembled isoforms" in the 75-95% bin than StringTie, which is different from the majority of the real human datasets. The results of the simulated data confirm that StringTie assembles more "95-100% assembled isoforms" than Scallop-LR, but Scallop-LR assembles more correctly predicted transcripts than StringTie (Table S12). This implies that while Scallop-LR outperforms StringTie in terms of the exact reference-matching transcripts (100% assembled, correct predictions), StringTie transcripts cover more reference transcripts on 95-99% of their bases than Scallop-LR transcripts.

We further performed the rnaQUAST evaluation on the simulated dataset by using the entire Ensembl annotation (*Homo sapiens* GRCh38.94) as the reference annotation. The resulting "95-100% assembled isoforms" are 3094 and 4613 for Scallop-LR and StringTie respectively. Compared with the corresponding results in Table S13 (which uses the "ground truth" as the reference annotation), StringTie assembles 365 more "95-100% assembled isoforms" when the entire Ensembl annotation is used as the reference. This implies that StringTie assembles 365 transcripts that are not in the ground truth but appear to be misassembled to match the reference

transcriptome. For Scallop-LR, the number of “95-100% assembled isoforms” by using the entire Ensembl annotation as the reference is very close to the number of “95-100% assembled isoforms” by using the “ground truth” as the reference (the difference between the numbers of “95-100% assembled isoforms” by using these two references is -9). This result may suggest that, for the real datasets, the “95-100% assembled isoforms” of StringTie could be somewhat inflated (i.e. some assembled transcripts are not in the ground truth but are misassembled to match certain transcripts in the reference), as we do not know the ground truth for the real datasets and use all known isoforms as the reference when evaluating the real data. On the other hand, based on this evidence, it seems that Scallop-LR stays consistent on this measure when the entire Ensembl annotation or the “ground truth” is used as the reference.

**Table S1:** Human Data: Sensitivity, Precision, and PR-AUC of Scallop-LR, StringTie, and Iso-Seq Analysis

| Datasets       | Sensitivity (%) |           |         | Precision (%)    |           |         | PR-AUC     |           |         |
|----------------|-----------------|-----------|---------|------------------|-----------|---------|------------|-----------|---------|
|                | Scallop-LR      | StringTie | Iso-Seq | Scallop-LR       | StringTie | Iso-Seq | Scallop-LR | StringTie | Iso-Seq |
| SAMN00001694   | 5.50            | 4.32      | 3.30    | 38.47            | 33.63     | 62.64   | 0.03389    | 0.02664   | 0.01868 |
| SAMN00001695   | 5.36            | 4.39      | 3.33    | 42.96            | 36.05     | 60.76   | 0.03363    | 0.02821   | 0.01808 |
| SAMN00001696   | 4.48            | 3.93      | 2.80    | 47.29            | 40.24     | 65.59   | 0.02916    | 0.02573   | 0.01636 |
| SAMN00006465   | 5.32            | 4.57      | 3.70    | 46.28            | 40.10     | 63.54   | 0.03563    | 0.03048   | 0.02085 |
| SAMN00006466   | 5.05            | 4.25      | 3.49    | 48.42            | 35.70     | 65.82   | 0.03489    | 0.02796   | 0.02051 |
| SAMN00006467   | 4.62            | 3.96      | 3.09    | 50.57            | 36.71     | 68.43   | 0.03200    | 0.02640   | 0.01875 |
| SAMN00006579   | 5.19            | 4.29      | 3.51    | 43.52            | 34.68     | 61.63   | 0.03359    | 0.02777   | 0.01916 |
| SAMN00006580   | 4.87            | 4.09      | 3.26    | 45.89            | 32.98     | 63.91   | 0.03239    | 0.02648   | 0.01839 |
| SAMN00006581   | 5.09            | 4.16      | 3.42    | 43.31            | 33.87     | 62.47   | 0.03287    | 0.02733   | 0.01906 |
| SAMN08182059   | 5.29            | 4.12      | 3.09    | 36.34            | 34.34     | 54.52   | 0.03138    | 0.02452   | 0.01515 |
| SAMN08182060   | 5.52            | 4.42      | 3.34    | 43.59            | 37.82     | 61.30   | 0.03617    | 0.02837   | 0.01832 |
| SAMN04563763   | 4.87            | 4.01      | 3.65    | 46.90            | 41.37     | 62.94   | 0.03320    | 0.02600   | 0.02047 |
| SAMN07611993   | 7.60<br>(7.26)  | 5.43      | 0.87    | 28.97<br>(46.47) | 32.65     | 55.42   | 0.04057    | 0.02910   | 0.00427 |
| SAMN04169050   | 6.86<br>(6.61)  | 4.83      | 4.62    | 30.90<br>(51.74) | 34.61     | 55.52   | 0.03807    | 0.02815   | 0.02296 |
| SAMN04251426.1 | 5.70<br>(5.46)  | 4.44      | 3.40    | 29.32<br>(40.72) | 32.40     | 49.64   | 0.02738    | 0.02457   | 0.01479 |
| SAMN04251426.2 | 5.76<br>(5.56)  | 4.44      | 3.49    | 29.92<br>(41.18) | 32.39     | 49.19   | 0.02749    | 0.02478   | 0.01507 |
| SAMN04251426.3 | 5.81<br>(5.52)  | 4.58      | 3.51    | 30.09<br>(40.37) | 33.44     | 48.93   | 0.02806    | 0.02537   | 0.01509 |
| SAMN04251426.4 | 5.78<br>(5.47)  | 4.55      | 3.52    | 30.59<br>(40.91) | 33.82     | 49.05   | 0.02828    | 0.02606   | 0.01492 |

The above table compares the Gffcompare evaluation results for Scallop-LR, StringTie, and Iso-Seq Analysis on human data. 18 human PacBio datasets were extracted from SRA, each corresponding to one BioSample and named by the BioSample ID (except that the last four datasets are four replicates for one BioSample). Multiple SRA Runs that belong to each BioSample were merged into a large dataset to perform the analyses. The first nine datasets were sequenced using the RS instrument and the last nine datasets were sequenced using the RS II instrument. Sensitivity is the ratio of the number of correctly predicted known transcripts over the total number of known transcripts, and precision is the ratio of the number of correctly predicted known transcripts over the total number of predicted transcripts. PR-AUC was calculated from the precision-recall curves we generated. The values within the parentheses are the adjusted sensitivity and adjusted precision. The adjusted sensitivity for Scallop-LR was calculated by matching the precision of StringTie, and the adjusted precision for Scallop-LR was calculated by matching the sensitivity of StringTie. The adjusted sensitivity and precision were only calculated for the last six datasets, since the last six datasets have opposite trends on sensitivity and precision comparing Scallop-LR and StringTie.

**Table S2:** Human Data: Correctly Predicted Known Transcripts, Total Multi-Exon Transcripts, and Potential Novel Isoforms of Scallop-LR, StringTie, and Iso-Seq Analysis

| Datasets       | # Potential Novel Isoforms |           |         | # Total Multi-Exon Transcripts |           |         | # Correctly Predicted Known Transcripts |           |         |
|----------------|----------------------------|-----------|---------|--------------------------------|-----------|---------|-----------------------------------------|-----------|---------|
|                | Scallop-LR                 | StringTie | Iso-Seq | Scallop-LR                     | StringTie | Iso-Seq | Scallop-LR                              | StringTie | Iso-Seq |
| SAMN00001694   | 12050                      | 6827      | 2847    | 24903                          | 22370     | 9166    | 9580                                    | 7522      | 5742    |
| SAMN00001695   | 9905                       | 6149      | 2856    | 21731                          | 21201     | 9554    | 9336                                    | 7642      | 5805    |
| SAMN00001696   | 7425                       | 5129      | 2122    | 16476                          | 16983     | 7423    | 7791                                    | 6834      | 4869    |
| SAMN00006465   | 9112                       | 6111      | 2941    | 20019                          | 19847     | 10136   | 9264                                    | 7958      | 6440    |
| SAMN00006466   | 8054                       | 5387      | 2561    | 18171                          | 20715     | 9236    | 8798                                    | 7396      | 6079    |
| SAMN00006467   | 6838                       | 4710      | 2054    | 15900                          | 18783     | 7865    | 8040                                    | 6896      | 5382    |
| SAMN00006579   | 10250                      | 6020      | 3175    | 20742                          | 21508     | 9906    | 9027                                    | 7460      | 6105    |
| SAMN00006580   | 8623                       | 5295      | 2640    | 18467                          | 21607     | 8870    | 8474                                    | 7125      | 5669    |
| SAMN00006581   | 10064                      | 5736      | 2974    | 20458                          | 21376     | 9531    | 8861                                    | 7241      | 5954    |
| SAMN08182059   | 13318                      | 7610      | 3609    | 25332                          | 20893     | 9876    | 9206                                    | 7175      | 5384    |
| SAMN08182060   | 10207                      | 6732      | 2951    | 22038                          | 20348     | 9478    | 9606                                    | 7696      | 5810    |
| SAMN04563763   | 7496                       | 5464      | 2965    | 18078                          | 16857     | 10087   | 8478                                    | 6973      | 6349    |
| SAMN07611993   | 22834                      | 10532     | 852     | 45657                          | 28953     | 2741    | 13226                                   | 9453      | 1519    |
| SAMN04169050   | 22403                      | 9059      | 5696    | 38657                          | 24280     | 14493   | 11946                                   | 8403      | 8047    |
| SAMN04251426.1 | 17074                      | 8572      | 4887    | 33824                          | 23863     | 11913   | 9916                                    | 7731      | 5914    |
| SAMN04251426.2 | 16871                      | 8403      | 5090    | 33534                          | 23849     | 12363   | 10034                                   | 7724      | 6081    |
| SAMN04251426.3 | 16916                      | 8580      | 5191    | 33637                          | 23850     | 12472   | 10122                                   | 7976      | 6103    |
| SAMN04251426.4 | 16347                      | 8314      | 5194    | 32908                          | 23423     | 12476   | 10065                                   | 7922      | 6119    |

The above table compares additional Gffcompare evaluation results for Scallop-LR, StringTie, and Iso-Seq Analysis on human data. The same 18 human PacBio datasets as described in Table S1 were evaluated. A Correctly Predicted Known Transcript is a transcript that has the exact intron-chain matching with a transcript in the reference annotation. A Potential Novel Isoform is a predicted transcript that shares at least one splice junction with a reference transcript. The # Total Multi-Exon Transcripts is the total number of predicted multi-exon transcripts.



**Table S3:** Mouse Data: Sensitivity, Precision, and PR-AUC of Scallop-LR, StringTie, and Iso-Seq Analysis

| Datasets     | Sensitivity (%) |                |         | Precision (%) |                  |         | PR-AUC     |           |         |
|--------------|-----------------|----------------|---------|---------------|------------------|---------|------------|-----------|---------|
|              | Scallop-LR      | StringTie      | Iso-Seq | Scallop-LR    | StringTie        | Iso-Seq | Scallop-LR | StringTie | Iso-Seq |
| SAMEA3374575 | 3.82            | 4.18<br>(3.70) | 2.52    | 60.50         | 51.08<br>(57.55) | 72.74   | 0.02538    | 0.02716   | 0.01571 |
| SAMEA3374576 | 4.00            | 4.49<br>(3.87) | 2.79    | 64.86         | 55.06<br>(62.48) | 77.74   | 0.02880    | 0.03069   | 0.01937 |
| SAMEA3374577 | 3.68            | 4.25<br>(3.61) | 2.52    | 67.14         | 56.71<br>(65.44) | 78.23   | 0.02668    | 0.02913   | 0.01744 |
| SAMEA3374578 | 3.49            | 3.96<br>(3.38) | 2.42    | 65.74         | 55.86<br>(64.21) | 80.37   | 0.02553    | 0.02714   | 0.01695 |
| SAMEA3374579 | 4.72            | 5.24<br>(4.48) | 2.98    | 63.83         | 50.86<br>(58.13) | 77.44   | 0.03338    | 0.03431   | 0.02040 |
| SAMEA3374580 | 4.70            | 5.26<br>(4.52) | 2.85    | 62.42         | 48.50<br>(58.28) | 77.87   | 0.03385    | 0.03475   | 0.01933 |
| SAMEA3374581 | 5.43            | 5.73<br>(4.93) | 3.33    | 60.04         | 46.09<br>(50.63) | 73.58   | 0.03838    | 0.03568   | 0.02155 |
| SAMEA3374582 | 4.27            | 4.71<br>(4.05) | 2.49    | 57.57         | 45.62<br>(53.16) | 75.21   | 0.02932    | 0.02870   | 0.01637 |

This table compares the Gffcompare evaluation results for Scallop-LR, StringTie, and Iso-Seq Analysis on mouse data. Eight mouse PacBio datasets were extracted from SRA, each corresponding to one BioSample and named by the BioSample ID. Multiple SRA Runs that belong to each BioSample were merged into a large dataset to perform the analyses. All eight datasets were sequenced using the RS instrument. Sensitivity, precision, and PR-AUC are as described in Table S1. The values within the parentheses are the adjusted sensitivity and adjusted precision. The adjusted sensitivity for StringTie was calculated by matching the precision of Scallop-LR, and the adjusted precision for StringTie was calculated by matching the sensitivity of Scallop-LR. The adjusted sensitivity and precision were calculated for all eight datasets, since all eight datasets have opposite trends on sensitivity and precision comparing Scallop-LR and StringTie.

**Table S4:** Mouse Data: Correctly Predicted Known Transcripts, Total Multi-Exon Transcripts, and Potential Novel Isoforms of Scallop-LR, StringTie, and Iso-Seq Analysis

| Datasets     | # Potential Novel Isoforms |           |         | # Total Multi-Exon Transcripts |           |         | # Correctly Predicted Known Transcripts |           |         |
|--------------|----------------------------|-----------|---------|--------------------------------|-----------|---------|-----------------------------------------|-----------|---------|
|              | Scallop-LR                 | StringTie | Iso-Seq | Scallop-LR                     | StringTie | Iso-Seq | Scallop-LR                              | StringTie | Iso-Seq |
| SAMEA3374575 | 1973                       | 2476      | 829     | 6879                           | 8913      | 3768    | 4162                                    | 4553      | 2741    |
| SAMEA3374576 | 1671                       | 2206      | 699     | 6707                           | 8870      | 3903    | 4350                                    | 4884      | 3034    |
| SAMEA3374577 | 1468                       | 1973      | 596     | 5962                           | 8155      | 3505    | 4003                                    | 4625      | 2742    |
| SAMEA3374578 | 1434                       | 1958      | 520     | 5774                           | 7723      | 3280    | 3796                                    | 4314      | 2636    |
| SAMEA3374579 | 2003                       | 2973      | 663     | 8048                           | 11221     | 4193    | 5137                                    | 5707      | 3247    |
| SAMEA3374580 | 2020                       | 3237      | 543     | 8204                           | 11801     | 3981    | 5121                                    | 5724      | 3100    |
| SAMEA3374581 | 2714                       | 3806      | 832     | 9842                           | 13531     | 4920    | 5909                                    | 6237      | 3620    |
| SAMEA3374582 | 1803                       | 2934      | 414     | 8069                           | 11233     | 3606    | 4645                                    | 5125      | 2712    |

This table compares additional Gffcompare evaluation results for Scallop-LR, StringTie, and Iso-Seq Analysis on mouse data. The same eight mouse PacBio datasets as described in Table S3 were evaluated. The Correctly Predicted Known Transcript, Potential Novel Isoform, and # Total Multi-Exon Transcripts are as described in Table S2.

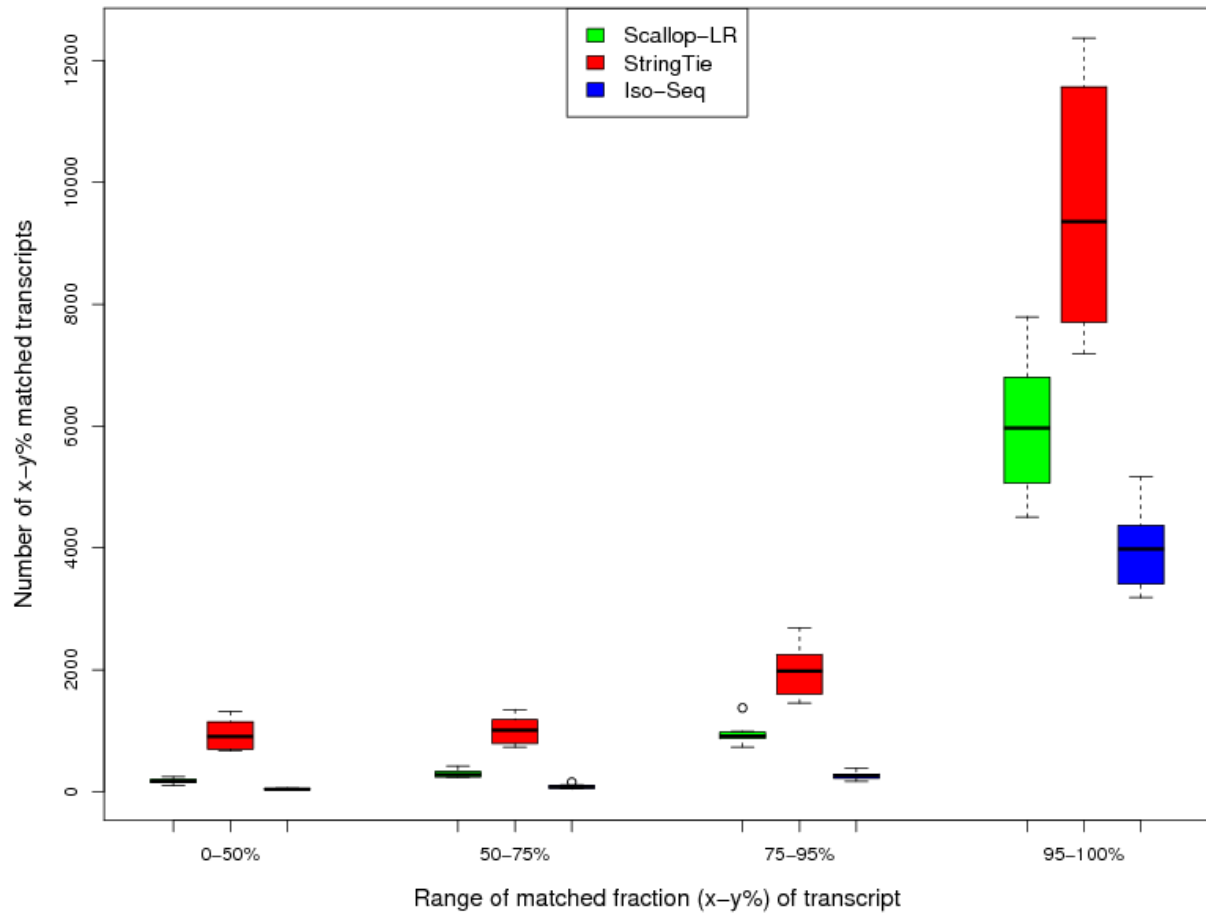

**Figure S1:** Mouse data: box-whisker plots of matched transcripts in four matched fraction bins for Scallop-LR, StringTie, and Iso-Seq Analysis, based on rnaQUAST evaluations. This figure is to compare numbers of x-y% matched transcripts. The same eight mouse PacBio datasets as described in Table S3 were evaluated via rnaQUAST. Figure axis descriptions are the same as in Figure 7.

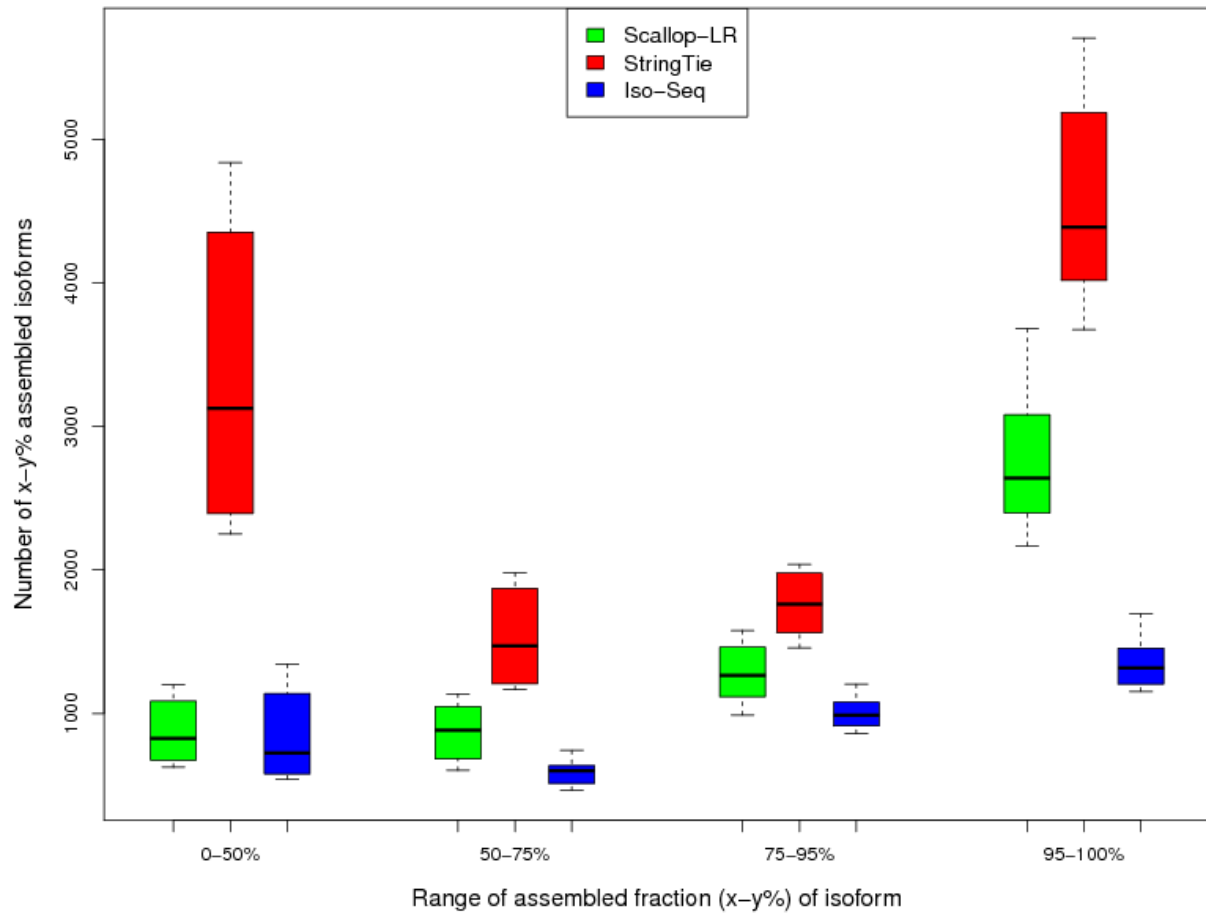

**Figure S2:** Mouse data: box-whisker plots of assembled isoforms in four assembled fraction bins for Scallop-LR, StringTie, and Iso-Seq Analysis, based on rnaQUAST evaluations. This figure is to compare numbers of x-y% assembled isoforms. The same eight mouse PacBio datasets as described in Table S3 were evaluated via rnaQUAST. Figure axis descriptions are the same as in Figure 8.

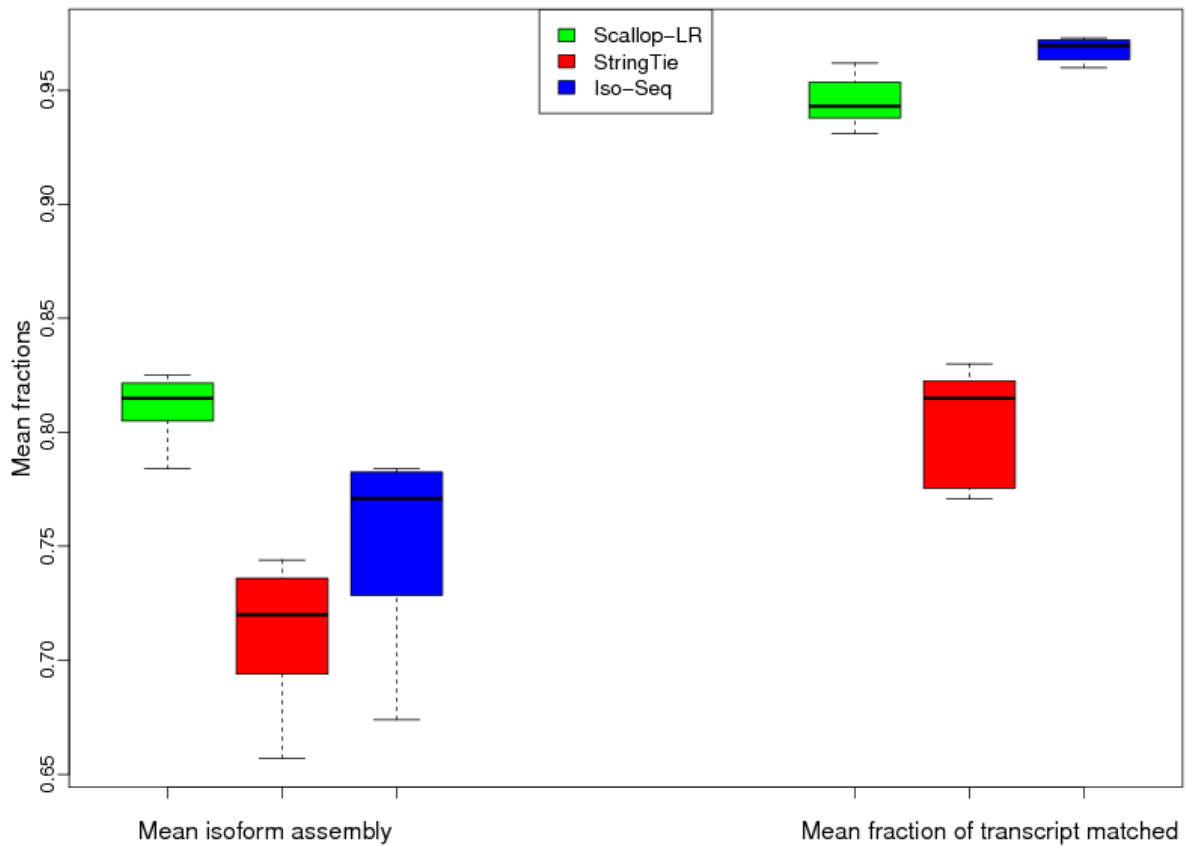

**Figure S3:** Mouse data: box-whisker plots of mean isoform assembly and mean fraction of transcript matched for Scallop-LR, StringTie, and Iso-Seq Analysis, based on rnaQUAST evaluations. The same eight mouse PacBio datasets as described in Table S3 were evaluated via rnaQUAST. Figure axis descriptions are the same as in Figure 9.

**Table S5:** Human Data: Numbers of FSM, NIC, NNC, and ISM transcripts of Scallop-LR and Iso-Seq Analysis based on SQANTI evaluations

| Datasets       | # of FSM   |         | # of NIC   |         | # of NNC   |         | # of ISM   |         |
|----------------|------------|---------|------------|---------|------------|---------|------------|---------|
|                | Scallop-LR | Iso-Seq | Scallop-LR | Iso-Seq | Scallop-LR | Iso-Seq | Scallop-LR | Iso-Seq |
| SAMN00001694   | 9594       | 5736    | 6375       | 1586    | 5579       | 1232    | 2411       | 487     |
| SAMN00001695   | 9329       | 5800    | 5765       | 1624    | 4045       | 1263    | 1934       | 776     |
| SAMN00001696   | 7787       | 4861    | 4054       | 1198    | 3294       | 930     | 934        | 369     |
| SAMN00006465   | 9266       | 6434    | 5080       | 1638    | 3962       | 1281    | 1141       | 630     |
| SAMN00006466   | 8796       | 6071    | 4548       | 1488    | 3479       | 1057    | 837        | 493     |
| SAMN00006467   | 8039       | 5375    | 3890       | 1173    | 2890       | 854     | 633        | 340     |
| SAMN00006579   | 9026       | 6096    | 5979       | 1759    | 4115       | 1297    | 903        | 505     |
| SAMN00006580   | 8472       | 5665    | 4903       | 1478    | 3628       | 1060    | 772        | 415     |
| SAMN00006581   | 8859       | 5947    | 5889       | 1765    | 4104       | 1176    | 919        | 470     |
| SAMN08182059   | 9220       | 5545    | 7874       | 2206    | 5488       | 1611    | 1898       | 1612    |
| SAMN08182060   | 9616       | 5941    | 4882       | 1433    | 5375       | 1674    | 1244       | 888     |
| SAMN04563763   | 8480       | 6535    | 4174       | 1899    | 3368       | 1297    | 1556       | 1066    |
| SAMN07611993   | 13275      | 1564    | 13406      | 533     | 9518       | 438     | 7186       | 531     |
| SAMN04169050   | 11984      | 8193    | 12490      | 3364    | 9737       | 2616    | 2616       | 1141    |
| SAMN04251426.1 | 9934       | 6114    | 9831       | 3497    | 7174       | 2175    | 5070       | 1729    |
| SAMN04251426.2 | 10058      | 6317    | 9771       | 3630    | 6972       | 2248    | 4813       | 1886    |
| SAMN04251426.3 | 10150      | 6327    | 9830       | 3814    | 6970       | 2249    | 4969       | 1840    |
| SAMN04251426.4 | 10081      | 6340    | 9545       | 3719    | 6695       | 2282    | 4818       | 1851    |

The above table compares the SQANTI evaluation results for Scallop-LR and Iso-Seq Analysis on human data. The same 18 human PacBio datasets as described in Table S1 were evaluated. FSM (Full Splice Match): the predicted transcript that matches a reference transcript at all splice junctions. ISM (Incomplete Splice Match): the predicted transcript that matches consecutive, but not all, splice junctions of a reference transcript. NIC (Novel in Catalog): the predicted transcript that contains new combinations of already annotated splice junctions or novel splice junctions formed from already annotated donors and acceptors. NNC (Novel Not in Catalog): the predicted transcript that contains novel splice junctions formed from novel donors or/and novel acceptors.

**Table S6:** Mouse Data: Numbers of FSM, NIC, NNC, and ISM transcripts of Scallop-LR and Iso-Seq Analysis based on SQANTI evaluations

| Datasets     | # of FSM   |         | # of NIC   |         | # of NNC   |         | # of ISM   |         |
|--------------|------------|---------|------------|---------|------------|---------|------------|---------|
|              | Scallop-LR | Iso-Seq | Scallop-LR | Iso-Seq | Scallop-LR | Iso-Seq | Scallop-LR | Iso-Seq |
| SAMEA3374575 | 4170       | 2865    | 503        | 153     | 1366       | 610     | 513        | 258     |
| SAMEA3374576 | 4358       | 3145    | 503        | 207     | 1125       | 470     | 489        | 240     |
| SAMEA3374577 | 4009       | 2840    | 446        | 169     | 983        | 378     | 355        | 194     |
| SAMEA3374578 | 3799       | 2718    | 545        | 202     | 906        | 326     | 362        | 188     |
| SAMEA3374579 | 5137       | 3410    | 591        | 190     | 1400       | 463     | 689        | 437     |
| SAMEA3374580 | 5121       | 3284    | 736        | 210     | 1323       | 359     | 843        | 714     |
| SAMEA3374581 | 5912       | 3834    | 931        | 283     | 1784       | 522     | 936        | 905     |
| SAMEA3374582 | 4644       | 2874    | 685        | 199     | 1198       | 254     | 1398       | 1261    |

This table compares the SQANTI evaluation results for Scallop-LR and Iso-Seq Analysis on mouse data. The same eight mouse PacBio datasets as described in Table S3 were evaluated. Metrics descriptions are the same as in Table S5.



**Table S7.1:** rnaQUAST evaluation results for human dataset SAMN08182059, comparing Scallop-LR, StringTie, and Iso-Seq Analysis

| Metrics                             | Scallop-LR | StringTie | Iso-Seq |
|-------------------------------------|------------|-----------|---------|
| # Transcripts                       | 25364      | 32230     | 11467   |
| Aligned                             | 25363      | 32224     | 11467   |
| Uniquely aligned                    | 25361      | 32028     | 11444   |
| Unaligned                           | 1          | 6         | 0       |
| Misassemblies                       | 2          | 4         | 4       |
| 0-50% assembled isoforms            | 1412       | 4156      | 1681    |
| 50-75% assembled isoforms           | 1827       | 2332      | 1358    |
| 75-95% assembled isoforms           | 2994       | 3012      | 1994    |
| 95-100% assembled isoforms          | 6052       | 6691      | 2507    |
| Mean isoform assembly               | 0.834      | 0.729     | 0.74    |
| 0-50% matched transcripts           | 1917       | 4466      | 267     |
| 50-75% matched transcripts          | 2057       | 2394      | 231     |
| 75-95% matched transcripts          | 4612       | 3659      | 734     |
| 95-100% matched transcripts         | 16595      | 12570     | 9971    |
| Unannotated                         | 180        | 9118      | 260     |
| Mean fraction of transcript matched | 0.883      | 0.558     | 0.939   |

This table compares the rnaQUAST evaluation results for Scallop-LR, StringTie, and Iso-Seq Analysis on a human dataset. “Isoforms” refer to reference transcripts from the gene annotation database, and “transcripts” refer to predicted transcripts. “# Transcripts” is the total number of predicted transcripts (including single-exon transcripts). “Aligned” is the number of transcripts which have at least one significant alignment to the reference genome. “Uniquely aligned” is the number of transcripts which have a single significant alignment. “Unaligned” is the number of transcripts without any significant alignments. “Misassemblies” are the transcripts that have discordant best-scored alignments (i.e. partial alignments that are mapped to different strands, different chromosomes, in reverse order, or too far away). “Unannotated” is the number of transcripts that do not cover any isoform from the annotation database. “x-y% assembled isoforms” is the number of isoforms from the annotation database that have at least x% and at most y% captured by a single predicted transcript. “x-y% matched transcripts” is the number of transcripts that have at least x% and at most y% matching an isoform from the annotation database. “Mean isoform assembly” is the average value of assembled fractions, where the assembled fraction of an isoform is computed as the largest number of its bases captured by a single predicted transcript divided by its length. “Mean fraction of transcript matched” is the average value of matched fractions, where the matched fraction of a transcript is computed as the number of its bases covering an isoform divided by the transcript length.

**Table S7.2:** rnaQUAST evaluation results for human dataset SAMN08182060, comparing Scallop-LR, StringTie, and Iso-Seq Analysis

| Metrics                             | Scallop-LR | StringTie | Iso-Seq |
|-------------------------------------|------------|-----------|---------|
| # Transcripts                       | 22065      | 29664     | 10233   |
| Aligned                             | 22065      | 29660     | 10233   |
| Uniquely aligned                    | 22057      | 29480     | 10219   |
| Unaligned                           | 0          | 4         | 0       |
| Misassemblies                       | 3          | 4         | 2       |
| 0-50% assembled isoforms            | 1205       | 3659      | 1154    |
| 50-75% assembled isoforms           | 1547       | 1994      | 1236    |
| 75-95% assembled isoforms           | 2759       | 2810      | 2035    |
| 95-100% assembled isoforms          | 6760       | 7420      | 3064    |
| Mean isoform assembly               | 0.855      | 0.757     | 0.794   |
| 0-50% matched transcripts           | 1677       | 4263      | 266     |
| 50-75% matched transcripts          | 1806       | 2147      | 186     |
| 75-95% matched transcripts          | 4035       | 3588      | 652     |
| 95-100% matched transcripts         | 14376      | 11914     | 9004    |
| Unannotated                         | 165        | 7726      | 123     |
| Mean fraction of transcript matched | 0.881      | 0.577     | 0.948   |

This table compares the rnaQUAST evaluation results for Scallop-LR, StringTie, and Iso-Seq Analysis on a human dataset. Metrics descriptions are the same as in Table S7.1.

**Table S7.3:** rnaQUAST evaluation results for human dataset SAMN04563763, comparing Scallop-LR, StringTie, and Iso-Seq Analysis

| Metrics                             | Scallop-LR | StringTie | Iso-Seq |
|-------------------------------------|------------|-----------|---------|
| # Transcripts                       | 18097      | 29003     | 11103   |
| Aligned                             | 18096      | 29002     | 11103   |
| Uniquely aligned                    | 18093      | 28788     | 11088   |
| Unaligned                           | 1          | 1         | 0       |
| Misassemblies                       | 2          | 3         | 0       |
| 0-50% assembled isoforms            | 2212       | 5762      | 1926    |
| 50-75% assembled isoforms           | 1792       | 2496      | 1411    |
| 75-95% assembled isoforms           | 2034       | 2227      | 1954    |
| 95-100% assembled isoforms          | 4523       | 5567      | 2669    |
| Mean isoform assembly               | 0.765      | 0.657     | 0.731   |
| 0-50% matched transcripts           | 927        | 3126      | 362     |
| 50-75% matched transcripts          | 1657       | 2337      | 327     |
| 75-95% matched transcripts          | 4318       | 3769      | 1166    |
| 95-100% matched transcripts         | 11053      | 11733     | 9105    |
| Unannotated                         | 138        | 8017      | 143     |
| Mean fraction of transcript matched | 0.89       | 0.59      | 0.934   |

This table compares the rnaQUAST evaluation results for Scallop-LR, StringTie, and Iso-Seq Analysis on a human dataset. Metrics descriptions are the same as in Table S7.1.

**Table S7.4:** rnaQUAST evaluation results for human dataset SAMN07611993, comparing Scallop-LR, StringTie, and Iso-Seq Analysis

| Metrics                             | Scallop-LR | StringTie | Iso-Seq |
|-------------------------------------|------------|-----------|---------|
| # Transcripts                       | 45773      | 42040     | 3382    |
| Aligned                             | 45769      | 42028     | 3382    |
| Uniquely aligned                    | 45763      | 41813     | 3378    |
| Unaligned                           | 4          | 12        | 0       |
| Misassemblies                       | 5          | 9         | 3       |
| 0-50% assembled isoforms            | 1572       | 3951      | 371     |
| 50-75% assembled isoforms           | 2380       | 2458      | 471     |
| 75-95% assembled isoforms           | 4597       | 4269      | 617     |
| 95-100% assembled isoforms          | 9173       | 9143      | 1030    |
| Mean isoform assembly               | 0.855      | 0.775     | 0.795   |
| 0-50% matched transcripts           | 5156       | 6578      | 204     |
| 50-75% matched transcripts          | 5739       | 3356      | 126     |
| 75-95% matched transcripts          | 9454       | 4814      | 203     |
| 95-100% matched transcripts         | 24821      | 15300     | 2709    |
| Unannotated                         | 594        | 11959     | 137     |
| Mean fraction of transcript matched | 0.832      | 0.544     | 0.883   |

This table compares the rnaQUAST evaluation results for Scallop-LR, StringTie, and Iso-Seq Analysis on a human dataset. Metrics descriptions are the same as in Table S7.1.

**Table S7.5:** maQUAST evaluation results for human dataset SAMN04169050, comparing Scallop-LR, StringTie, and Iso-Seq Analysis

| Metrics                             | Scallop-LR | StringTie | Iso-Seq |
|-------------------------------------|------------|-----------|---------|
| # Transcripts                       | 38737      | 33225     | 15752   |
| Aligned                             | 38734      | 33217     | 15752   |
| Uniquely aligned                    | 38727      | 33099     | 15750   |
| Unaligned                           | 3          | 8         | 0       |
| Misassemblies                       | 6          | 7         | 0       |
| 0-50% assembled isoforms            | 1203       | 3458      | 1387    |
| 50-75% assembled isoforms           | 1691       | 1917      | 1596    |
| 75-95% assembled isoforms           | 3377       | 3015      | 2686    |
| 95-100% assembled isoforms          | 9238       | 8800      | 4378    |
| Mean isoform assembly               | 0.877      | 0.784     | 0.809   |
| 0-50% matched transcripts           | 6034       | 6593      | 580     |
| 50-75% matched transcripts          | 5428       | 3086      | 506     |
| 75-95% matched transcripts          | 8205       | 4216      | 1232    |
| 95-100% matched transcripts         | 18839      | 11650     | 13320   |
| Unannotated                         | 221        | 7662      | 114     |
| Mean fraction of transcript matched | 0.802      | 0.558     | 0.939   |

This table compares the maQUAST evaluation results for Scallop-LR, StringTie, and Iso-Seq Analysis on a human dataset. Metrics descriptions are the same as in Table S7.1.

**Table S7.6:** maQUAST evaluation results for human dataset SAMN04251426.1, comparing Scallop-LR, StringTie, and Iso-Seq Analysis

| Metrics                             | Scallop-LR | StringTie | Iso-Seq |
|-------------------------------------|------------|-----------|---------|
| # Transcripts                       | 33883      | 41154     | 15342   |
| Aligned                             | 33882      | 41147     | 15342   |
| Uniquely aligned                    | 33881      | 40883     | 15322   |
| Unaligned                           | 1          | 7         | 0       |
| Misassemblies                       | 1          | 19        | 10      |
| 0-50% assembled isoforms            | 1972       | 5067      | 1999    |
| 50-75% assembled isoforms           | 2334       | 2666      | 1812    |
| 75-95% assembled isoforms           | 3649       | 3429      | 2323    |
| 95-100% assembled isoforms          | 6903       | 7347      | 3350    |
| Mean isoform assembly               | 0.815      | 0.714     | 0.747   |
| 0-50% matched transcripts           | 4722       | 7576      | 1554    |
| 50-75% matched transcripts          | 4542       | 3059      | 865     |
| 75-95% matched transcripts          | 6157       | 3734      | 1385    |
| 95-100% matched transcripts         | 17879      | 11661     | 10297   |
| Unannotated                         | 581        | 15084     | 1228    |
| Mean fraction of transcript matched | 0.807      | 0.442     | 0.806   |

This table compares the maQUAST evaluation results for Scallop-LR, StringTie, and Iso-Seq Analysis on a human dataset. Metrics descriptions are the same as in Table S7.1.

**Table S7.7:** maQUAST evaluation results for human dataset SAMN04251426.2, comparing Scallop-LR, StringTie, and Iso-Seq Analysis

| Metrics                             | Scallop-LR | StringTie | Iso-Seq |
|-------------------------------------|------------|-----------|---------|
| # Transcripts                       | 33588      | 41008     | 16119   |
| Aligned                             | 33587      | 41004     | 16119   |
| Uniquely aligned                    | 33578      | 40814     | 16104   |
| Unaligned                           | 1          | 4         | 0       |
| Misassemblies                       | 6          | 11        | 7       |
| 0-50% assembled isoforms            | 1903       | 5087      | 2051    |
| 50-75% assembled isoforms           | 2201       | 2609      | 1827    |
| 75-95% assembled isoforms           | 3602       | 3276      | 2418    |
| 95-100% assembled isoforms          | 7051       | 7377      | 3477    |
| Mean isoform assembly               | 0.821      | 0.713     | 0.748   |
| 0-50% matched transcripts           | 4834       | 7801      | 1615    |
| 50-75% matched transcripts          | 4525       | 3048      | 925     |
| 75-95% matched transcripts          | 6174       | 3653      | 1393    |
| 95-100% matched transcripts         | 17429      | 11337     | 10787   |
| Unannotated                         | 616        | 15143     | 1389    |
| Mean fraction of transcript matched | 0.802      | 0.435     | 0.8     |

This table compares the maQUAST evaluation results for Scallop-LR, StringTie, and Iso-Seq Analysis on a human dataset. Metrics descriptions are the same as in Table S7.1.

**Table S7.8:** rnaQUAST evaluation results for human dataset SAMN04251426.3, comparing Scallop-LR, StringTie, and Iso-Seq Analysis

| Metrics                             | Scallop-LR | StringTie | Iso-Seq |
|-------------------------------------|------------|-----------|---------|
| # Transcripts                       | 33699      | 41038     | 16328   |
| Aligned                             | 33698      | 41036     | 16328   |
| Uniquely aligned                    | 33691      | 40815     | 16306   |
| Unaligned                           | 1          | 2         | 0       |
| Misassemblies                       | 6          | 16        | 4       |
| 0-50% assembled isoforms            | 1894       | 5007      | 2146    |
| 50-75% assembled isoforms           | 2236       | 2616      | 1834    |
| 75-95% assembled isoforms           | 3486       | 3416      | 2417    |
| 95-100% assembled isoforms          | 7089       | 7384      | 3471    |
| Mean isoform assembly               | 0.821      | 0.717     | 0.744   |
| 0-50% matched transcripts           | 4595       | 7693      | 1707    |
| 50-75% matched transcripts          | 4538       | 3008      | 955     |
| 75-95% matched transcripts          | 6329       | 3757      | 1469    |
| 95-100% matched transcripts         | 17653      | 11587     | 10747   |
| Unannotated                         | 576        | 14965     | 1441    |
| Mean fraction of transcript matched | 0.808      | 0.441     | 0.794   |

This table compares the rnaQUAST evaluation results for Scallop-LR, StringTie, and Iso-Seq Analysis on a human dataset. Metrics descriptions are the same as in Table S7.1.



**Table S7.9:** rnaQUAST evaluation results for human dataset SAMN04251426.4, comparing Scallop-LR, StringTie, and Iso-Seq Analysis

| Metrics                             | Scallop-LR | StringTie | Iso-Seq |
|-------------------------------------|------------|-----------|---------|
| # Transcripts                       | 32952      | 40754     | 16179   |
| Aligned                             | 32951      | 40749     | 16179   |
| Uniquely aligned                    | 32943      | 40528     | 16157   |
| Unaligned                           | 1          | 5         | 0       |
| Misassemblies                       | 7          | 11        | 7       |
| 0-50% assembled isoforms            | 1940       | 5087      | 2109    |
| 50-75% assembled isoforms           | 2246       | 2729      | 1852    |
| 75-95% assembled isoforms           | 3563       | 3361      | 2430    |
| 95-100% assembled isoforms          | 6970       | 7220      | 3414    |
| Mean isoform assembly               | 0.818      | 0.711     | 0.743   |
| 0-50% matched transcripts           | 4634       | 7569      | 1647    |
| 50-75% matched transcripts          | 4322       | 3079      | 910     |
| 75-95% matched transcripts          | 6116       | 3565      | 1440    |
| 95-100% matched transcripts         | 17260      | 11484     | 10837   |
| Unannotated                         | 611        | 15037     | 1334    |
| Mean fraction of transcript matched | 0.806      | 0.438     | 0.803   |

This table compares the rnaQUAST evaluation results for Scallop-LR, StringTie, and Iso-Seq Analysis on a human dataset. Metrics descriptions are the same as in Table S7.1.

**Table S7.10:** rnaQUAST evaluation results for human dataset SAMN00001694, comparing Scallop-LR, StringTie, and Iso-Seq Analysis

| Metrics                             | Scallop-LR | StringTie | Iso-Seq |
|-------------------------------------|------------|-----------|---------|
| # Transcripts                       | 24956      | 81557     | 10813   |
| Aligned                             | 24956      | 81554     | 10813   |
| Uniquely aligned                    | 24948      | 81117     | 10802   |
| Unaligned                           | 0          | 3         | 0       |
| Misassemblies                       | 7          | 9         | 0       |
| 0-50% assembled isoforms            | 1547       | 8224      | 1070    |
| 50-75% assembled isoforms           | 2016       | 3162      | 1263    |
| 75-95% assembled isoforms           | 2967       | 3329      | 2025    |
| 95-100% assembled isoforms          | 6470       | 7697      | 3107    |
| Mean isoform assembly               | 0.83       | 0.64      | 0.802   |
| 0-50% matched transcripts           | 2015       | 11463     | 466     |
| 50-75% matched transcripts          | 2582       | 2822      | 398     |
| 75-95% matched transcripts          | 5034       | 3726      | 762     |
| 95-100% matched transcripts         | 15137      | 11144     | 8916    |
| Unannotated                         | 180        | 52379     | 270     |
| Mean fraction of transcript matched | 0.868      | 0.219     | 0.915   |

This table compares the rnaQUAST evaluation results for Scallop-LR, StringTie, and Iso-Seq Analysis on a human dataset. Metrics descriptions are the same as in Table S7.1.

**Table S7.11:** maQUAST evaluation results for human dataset SAMN00001695, comparing Scallop-LR, StringTie, and Iso-Seq Analysis

| Metrics                             | Scallop-LR | StringTie | Iso-Seq |
|-------------------------------------|------------|-----------|---------|
| # Transcripts                       | 21741      | 107273    | 12057   |
| Aligned                             | 21741      | 107269    | 12057   |
| Uniquely aligned                    | 21736      | 106575    | 12039   |
| Unaligned                           | 0          | 4         | 0       |
| Misassemblies                       | 3          | 15        | 1       |
| 0-50% assembled isoforms            | 1469       | 10422     | 1269    |
| 50-75% assembled isoforms           | 1808       | 3535      | 1356    |
| 75-95% assembled isoforms           | 2723       | 3400      | 2179    |
| 95-100% assembled isoforms          | 6144       | 8079      | 3138    |
| Mean isoform assembly               | 0.832      | 0.607     | 0.786   |
| 0-50% matched transcripts           | 1498       | 15153     | 606     |
| 50-75% matched transcripts          | 2146       | 2924      | 367     |
| 75-95% matched transcripts          | 4350       | 3529      | 829     |
| 95-100% matched transcripts         | 13582      | 10679     | 9484    |
| Unannotated                         | 161        | 74942     | 770     |
| Mean fraction of transcript matched | 0.879      | 0.165     | 0.872   |

This table compares the maQUAST evaluation results for Scallop-LR, StringTie, and Iso-Seq Analysis on a human dataset. Metrics descriptions are the same as in Table S7.1.

**Table S7.12:** maQUAST evaluation results for human dataset SAMN00001696, comparing Scallop-LR, StringTie, and Iso-Seq Analysis

| Metrics                             | Scallop-LR | StringTie | Iso-Seq |
|-------------------------------------|------------|-----------|---------|
| # Transcripts                       | 16487      | 65425     | 8855    |
| Aligned                             | 16487      | 65418     | 8855    |
| Uniquely aligned                    | 16482      | 65094     | 8847    |
| Unaligned                           | 0          | 7         | 0       |
| Misassemblies                       | 3          | 4         | 1       |
| 0-50% assembled isoforms            | 1183       | 7195      | 859     |
| 50-75% assembled isoforms           | 1482       | 2726      | 1004    |
| 75-95% assembled isoforms           | 2364       | 2904      | 1749    |
| 95-100% assembled isoforms          | 5115       | 6335      | 2604    |
| Mean isoform assembly               | 0.834      | 0.633     | 0.807   |
| 0-50% matched transcripts           | 1066       | 9110      | 350     |
| 50-75% matched transcripts          | 1454       | 2074      | 240     |
| 75-95% matched transcripts          | 3011       | 2636      | 573     |
| 95-100% matched transcripts         | 10875      | 9927      | 7369    |
| Unannotated                         | 77         | 41656     | 321     |
| Mean fraction of transcript matched | 0.891      | 0.227     | 0.911   |

This table compares the maQUAST evaluation results for Scallop-LR, StringTie, and Iso-Seq Analysis on a human dataset. Metrics descriptions are the same as in Table S7.1.

**Table S7.13:** rnaQUAST evaluation results for human dataset SAMN00006465, comparing Scallop-LR, StringTie, and Iso-Seq Analysis

| Metrics                             | Scallop-LR | StringTie | Iso-Seq |
|-------------------------------------|------------|-----------|---------|
| # Transcripts                       | 20038      | 82621     | 12557   |
| Aligned                             | 20038      | 82617     | 12557   |
| Uniquely aligned                    | 20033      | 82068     | 12546   |
| Unaligned                           | 0          | 4         | 0       |
| Misassemblies                       | 4          | 11        | 1       |
| 0-50% assembled isoforms            | 1333       | 8262      | 1180    |
| 50-75% assembled isoforms           | 1630       | 2921      | 1348    |
| 75-95% assembled isoforms           | 2517       | 3083      | 2176    |
| 95-100% assembled isoforms          | 6315       | 7746      | 3520    |
| Mean isoform assembly               | 0.842      | 0.636     | 0.804   |
| 0-50% matched transcripts           | 1375       | 11130     | 426     |
| 50-75% matched transcripts          | 1856       | 2375      | 397     |
| 75-95% matched transcripts          | 3993       | 3258      | 854     |
| 95-100% matched transcripts         | 12688      | 11297     | 10512   |
| Unannotated                         | 122        | 54521     | 367     |
| Mean fraction of transcript matched | 0.882      | 0.207     | 0.921   |

This table compares the rnaQUAST evaluation results for Scallop-LR, StringTie, and Iso-Seq Analysis on a human dataset. Metrics descriptions are the same as in Table S7.1.

**Table S7.14:** rnaQUAST evaluation results for human dataset SAMN00006466, comparing Scallop-LR, StringTie, and Iso-Seq Analysis

| Metrics                             | Scallop-LR | StringTie | Iso-Seq |
|-------------------------------------|------------|-----------|---------|
| # Transcripts                       | 18192      | 140280    | 12335   |
| Aligned                             | 18190      | 140274    | 12335   |
| Uniquely aligned                    | 18187      | 139647    | 12307   |
| Unaligned                           | 2          | 6         | 0       |
| Misassemblies                       | 1          | 18        | 1       |
| 0-50% assembled isoforms            | 1315       | 13372     | 1414    |
| 50-75% assembled isoforms           | 1502       | 3942      | 1229    |
| 75-95% assembled isoforms           | 2481       | 3485      | 2072    |
| 95-100% assembled isoforms          | 5899       | 8561      | 3280    |
| Mean isoform assembly               | 0.84       | 0.574     | 0.782   |
| 0-50% matched transcripts           | 1300       | 20842     | 701     |
| 50-75% matched transcripts          | 1649       | 3109      | 391     |
| 75-95% matched transcripts          | 3547       | 3061      | 749     |
| 95-100% matched transcripts         | 11541      | 9780      | 9300    |
| Unannotated                         | 151        | 103450    | 1193    |
| Mean fraction of transcript matched | 0.879      | 0.122     | 0.833   |

This table compares the rnaQUAST evaluation results for Scallop-LR, StringTie, and Iso-Seq Analysis on a human dataset. Metrics descriptions are the same as in Table S7.1.

**Table S7.15:** maQUAST evaluation results for human dataset SAMN00006467, comparing Scallop-LR, StringTie, and Iso-Seq Analysis

| Metrics                             | Scallop-LR | StringTie | Iso-Seq |
|-------------------------------------|------------|-----------|---------|
| # Transcripts                       | 15914      | 134501    | 10487   |
| Aligned                             | 15914      | 134492    | 10487   |
| Uniquely aligned                    | 15912      | 133856    | 10458   |
| Unaligned                           | 0          | 9         | 0       |
| Misassemblies                       | 2          | 17        | 0       |
| 0-50% assembled isoforms            | 1199       | 13214     | 1160    |
| 50-75% assembled isoforms           | 1396       | 3910      | 1081    |
| 75-95% assembled isoforms           | 2322       | 3441      | 1846    |
| 95-100% assembled isoforms          | 5296       | 8069      | 2925    |
| Mean isoform assembly               | 0.839      | 0.567     | 0.79    |
| 0-50% matched transcripts           | 1202       | 20694     | 674     |
| 50-75% matched transcripts          | 1463       | 2767      | 281     |
| 75-95% matched transcripts          | 2848       | 2744      | 574     |
| 95-100% matched transcripts         | 10264      | 8927      | 7765    |
| Unannotated                         | 135        | 99314     | 1192    |
| Mean fraction of transcript matched | 0.878      | 0.117     | 0.813   |

This table compares the maQUAST evaluation results for Scallop-LR, StringTie, and Iso-Seq Analysis on a human dataset. Metrics descriptions are the same as in Table S7.1.

**Table S7.16:** maQUAST evaluation results for human dataset SAMN00006579, comparing Scallop-LR, StringTie, and Iso-Seq Analysis

| Metrics                             | Scallop-LR | StringTie | Iso-Seq |
|-------------------------------------|------------|-----------|---------|
| # Transcripts                       | 20769      | 124624    | 13147   |
| Aligned                             | 20769      | 124621    | 13147   |
| Uniquely aligned                    | 20768      | 123959    | 13128   |
| Unaligned                           | 0          | 3         | 0       |
| Misassemblies                       | 1          | 25        | 4       |
| 0-50% assembled isoforms            | 1214       | 12066     | 1231    |
| 50-75% assembled isoforms           | 1516       | 3755      | 1299    |
| 75-95% assembled isoforms           | 2494       | 3507      | 2106    |
| 95-100% assembled isoforms          | 6387       | 8960      | 3508    |
| Mean isoform assembly               | 0.85       | 0.597     | 0.798   |
| 0-50% matched transcripts           | 1882       | 20058     | 848     |
| 50-75% matched transcripts          | 2384       | 2921      | 545     |
| 75-95% matched transcripts          | 4223       | 3167      | 895     |
| 95-100% matched transcripts         | 12105      | 9394      | 9655    |
| Unannotated                         | 174        | 89030     | 1199    |
| Mean fraction of transcript matched | 0.855      | 0.133     | 0.829   |

This table compares the maQUAST evaluation results for Scallop-LR, StringTie, and Iso-Seq Analysis on a human dataset. Metrics descriptions are the same as in Table S7.1.



**Table S7.17:** rnaQUAST evaluation results for human dataset SAMN00006580, comparing Scallop-LR, StringTie, and Iso-Seq Analysis

| Metrics                             | Scallop-LR | StringTie | Iso-Seq |
|-------------------------------------|------------|-----------|---------|
| # Transcripts                       | 18480      | 152741    | 12817   |
| Aligned                             | 18480      | 152739    | 12817   |
| Uniquely aligned                    | 18477      | 152257    | 12795   |
| Unaligned                           | 0          | 2         | 0       |
| Misassemblies                       | 1          | 17        | 5       |
| 0-50% assembled isoforms            | 1246       | 14212     | 1290    |
| 50-75% assembled isoforms           | 1497       | 4284      | 1192    |
| 75-95% assembled isoforms           | 2438       | 3834      | 2001    |
| 95-100% assembled isoforms          | 5809       | 9259      | 3276    |
| Mean isoform assembly               | 0.842      | 0.578     | 0.788   |
| 0-50% matched transcripts           | 1688       | 24592     | 1023    |
| 50-75% matched transcripts          | 1898       | 3141      | 427     |
| 75-95% matched transcripts          | 3507       | 2930      | 739     |
| 95-100% matched transcripts         | 11154      | 8948      | 8562    |
| Unannotated                         | 230        | 113096    | 2059    |
| Mean fraction of transcript matched | 0.856      | 0.108     | 0.75    |

This table compares the rnaQUAST evaluation results for Scallop-LR, StringTie, and Iso-Seq Analysis on a human dataset. Metrics descriptions are the same as in Table S7.1.

**Table S7.18:** maQUAST evaluation results for human dataset SAMN00006581, comparing Scallop-LR, StringTie, and Iso-Seq Analysis

| Metrics                             | Scallop-LR | StringTie | Iso-Seq |
|-------------------------------------|------------|-----------|---------|
| # Transcripts                       | 20476      | 125563    | 12512   |
| Aligned                             | 20476      | 125556    | 12512   |
| Uniquely aligned                    | 20475      | 125049    | 12495   |
| Unaligned                           | 0          | 7         | 0       |
| Misassemblies                       | 1          | 17        | 2       |
| 0-50% assembled isoforms            | 1279       | 11940     | 1195    |
| 50-75% assembled isoforms           | 1582       | 3652      | 1243    |
| 75-95% assembled isoforms           | 2452       | 3340      | 2128    |
| 95-100% assembled isoforms          | 6273       | 8602      | 3409    |
| Mean isoform assembly               | 0.844      | 0.592     | 0.799   |
| 0-50% matched transcripts           | 2036       | 19464     | 878     |
| 50-75% matched transcripts          | 2213       | 2901      | 417     |
| 75-95% matched transcripts          | 4104       | 2967      | 812     |
| 95-100% matched transcripts         | 11946      | 9341      | 9311    |
| Unannotated                         | 176        | 90846     | 1091    |
| Mean fraction of transcript matched | 0.852      | 0.13      | 0.832   |

This table compares the maQUAST evaluation results for Scallop-LR, StringTie, and Iso-Seq Analysis on a human dataset. Metrics descriptions are the same as in Table S7.1.

**Table S8.1:** rnaQUAST evaluation results for mouse dataset SAMEA3374575, comparing Scallop-LR, StringTie, and Iso-Seq Analysis

| Metrics                             | Scallop-LR | StringTie | Iso-Seq |
|-------------------------------------|------------|-----------|---------|
| # Transcripts                       | 6890       | 12610     | 4017    |
| Aligned                             | 6890       | 12610     | 4017    |
| Uniquely aligned                    | 6886       | 12528     | 4013    |
| Unaligned                           | 0          | 0         | 0       |
| Misassemblies                       | 4          | 1         | 0       |
| 0-50% assembled isoforms            | 703        | 2605      | 606     |
| 50-75% assembled isoforms           | 761        | 1258      | 520     |
| 75-95% assembled isoforms           | 1194       | 1597      | 1003    |
| 95-100% assembled isoforms          | 2451       | 4101      | 1248    |
| Mean isoform assembly               | 0.818      | 0.729     | 0.779   |
| 0-50% matched transcripts           | 243        | 765       | 41      |
| 50-75% matched transcripts          | 369        | 899       | 155     |
| 75-95% matched transcripts          | 920        | 1738      | 294     |
| 95-100% matched transcripts         | 5323       | 8108      | 3510    |
| Unannotated                         | 31         | 1098      | 16      |
| Mean fraction of transcript matched | 0.931      | 0.819     | 0.96    |

This table compares the rnaQUAST evaluation results for Scallop-LR, StringTie, and Iso-Seq Analysis on a mouse dataset. Metrics descriptions are the same as in Table S7.1.

**Table S8.2:** rnaQUAST evaluation results for mouse dataset SAMEA3374576, comparing Scallop-LR, StringTie, and Iso-Seq Analysis

| Metrics                             | Scallop-LR | StringTie | Iso-Seq |
|-------------------------------------|------------|-----------|---------|
| # Transcripts                       | 6720       | 12207     | 4164    |
| Aligned                             | 6720       | 12206     | 4164    |
| Uniquely aligned                    | 6715       | 12104     | 4163    |
| Unaligned                           | 0          | 1         | 0       |
| Misassemblies                       | 5          | 0         | 1       |
| 0-50% assembled isoforms            | 699        | 2406      | 616     |
| 50-75% assembled isoforms           | 706        | 1245      | 585     |
| 75-95% assembled isoforms           | 1155       | 1632      | 975     |
| 95-100% assembled isoforms          | 2563       | 4194      | 1385    |
| Mean isoform assembly               | 0.825      | 0.743     | 0.783   |
| 0-50% matched transcripts           | 176        | 700       | 48      |
| 50-75% matched transcripts          | 275        | 815       | 71      |
| 75-95% matched transcripts          | 899        | 1657      | 279     |
| 95-100% matched transcripts         | 5334       | 7967      | 3749    |
| Unannotated                         | 31         | 1067      | 16      |
| Mean fraction of transcript matched | 0.94       | 0.817     | 0.969   |

This table compares the rnaQUAST evaluation results for Scallop-LR, StringTie, and Iso-Seq Analysis on a mouse dataset. Metrics descriptions are the same as in Table S7.1.

**Table S8.3:** rnaQUAST evaluation results for mouse dataset SAMEA3374577, comparing Scallop-LR, StringTie, and Iso-Seq Analysis

| Metrics                             | Scallop-LR | StringTie | Iso-Seq |
|-------------------------------------|------------|-----------|---------|
| # Transcripts                       | 5972       | 11247     | 3699    |
| Aligned                             | 5972       | 11247     | 3699    |
| Uniquely aligned                    | 5967       | 11193     | 3695    |
| Unaligned                           | 0          | 0         | 0       |
| Misassemblies                       | 4          | 1         | 1       |
| 0-50% assembled isoforms            | 653        | 2250      | 554     |
| 50-75% assembled isoforms           | 662        | 1169      | 505     |
| 75-95% assembled isoforms           | 1078       | 1531      | 908     |
| 95-100% assembled isoforms          | 2343       | 3931      | 1222    |
| Mean isoform assembly               | 0.823      | 0.744     | 0.784   |
| 0-50% matched transcripts           | 180        | 667       | 60      |
| 50-75% matched transcripts          | 236        | 765       | 83      |
| 75-95% matched transcripts          | 732        | 1454      | 230     |
| 95-100% matched transcripts         | 4796       | 7442      | 3305    |
| Unannotated                         | 23         | 918       | 20      |
| Mean fraction of transcript matched | 0.942      | 0.826     | 0.963   |

This table compares the rnaQUAST evaluation results for Scallop-LR, StringTie, and Iso-Seq Analysis on a mouse dataset. Metrics descriptions are the same as in Table S7.1.

**Table S8.4:** rnaQUAST evaluation results for mouse dataset SAMEA3374578, comparing Scallop-LR, StringTie, and Iso-Seq Analysis

| Metrics                             | Scallop-LR | StringTie | Iso-Seq |
|-------------------------------------|------------|-----------|---------|
| # Transcripts                       | 5783       | 10979     | 3492    |
| Aligned                             | 5783       | 10979     | 3492    |
| Uniquely aligned                    | 5778       | 10925     | 3491    |
| Unaligned                           | 0          | 0         | 0       |
| Misassemblies                       | 5          | 0         | 0       |
| 0-50% assembled isoforms            | 625        | 2378      | 543     |
| 50-75% assembled isoforms           | 604        | 1166      | 466     |
| 75-95% assembled isoforms           | 989        | 1458      | 860     |
| 95-100% assembled isoforms          | 2169       | 3674      | 1154    |
| Mean isoform assembly               | 0.82       | 0.726     | 0.782   |
| 0-50% matched transcripts           | 160        | 696       | 23      |
| 50-75% matched transcripts          | 239        | 727       | 57      |
| 75-95% matched transcripts          | 842        | 1550      | 210     |
| 95-100% matched transcripts         | 4503       | 7184      | 3184    |
| Unannotated                         | 34         | 822       | 18      |
| Mean fraction of transcript matched | 0.936      | 0.83      | 0.973   |

This table compares the rnaQUAST evaluation results for Scallop-LR, StringTie, and Iso-Seq Analysis on a mouse dataset. Metrics descriptions are the same as in Table S7.1.

**Table S8.5:** rnaQUAST evaluation results for mouse dataset SAMEA3374579, comparing Scallop-LR, StringTie, and Iso-Seq Analysis

| Metrics                             | Scallop-LR | StringTie | Iso-Seq |
|-------------------------------------|------------|-----------|---------|
| # Transcripts                       | 8052       | 16520     | 4609    |
| Aligned                             | 8052       | 16520     | 4609    |
| Uniquely aligned                    | 8052       | 16414     | 4600    |
| Unaligned                           | 0          | 0         | 0       |
| Misassemblies                       | 0          | 0         | 0       |
| 0-50% assembled isoforms            | 949        | 3648      | 835     |
| 50-75% assembled isoforms           | 1006       | 1687      | 650     |
| 75-95% assembled isoforms           | 1433       | 1994      | 1111    |
| 95-100% assembled isoforms          | 3104       | 5197      | 1502    |
| Mean isoform assembly               | 0.812      | 0.714     | 0.763   |
| 0-50% matched transcripts           | 155        | 1046      | 26      |
| 50-75% matched transcripts          | 288        | 1119      | 82      |
| 75-95% matched transcripts          | 989        | 2223      | 268     |
| 95-100% matched transcripts         | 6598       | 10605     | 4213    |
| Unannotated                         | 22         | 1526      | 19      |
| Mean fraction of transcript matched | 0.952      | 0.813     | 0.972   |

This table compares the rnaQUAST evaluation results for Scallop-LR, StringTie, and Iso-Seq Analysis on a mouse dataset. Metrics descriptions are the same as in Table S7.1.

**Table S8.6:** maQUAST evaluation results for mouse dataset SAMEA3374580, comparing Scallop-LR, StringTie, and Iso-Seq Analysis

| Metrics                             | Scallop-LR | StringTie | Iso-Seq |
|-------------------------------------|------------|-----------|---------|
| # Transcripts                       | 8206       | 18482     | 4679    |
| Aligned                             | 8206       | 18480     | 4679    |
| Uniquely aligned                    | 8206       | 18301     | 4670    |
| Unaligned                           | 0          | 2         | 0       |
| Misassemblies                       | 0          | 0         | 1       |
| 0-50% assembled isoforms            | 1057       | 4217      | 1028    |
| 50-75% assembled isoforms           | 1016       | 1811      | 627     |
| 75-95% assembled isoforms           | 1491       | 1961      | 1047    |
| 95-100% assembled isoforms          | 3058       | 5173      | 1408    |
| Mean isoform assembly               | 0.802      | 0.692     | 0.729   |
| 0-50% matched transcripts           | 149        | 1199      | 42      |
| 50-75% matched transcripts          | 281        | 1196      | 57      |
| 75-95% matched transcripts          | 960        | 2229      | 257     |
| 95-100% matched transcripts         | 6794       | 11398     | 4297    |
| Unannotated                         | 22         | 2457      | 22      |
| Mean fraction of transcript matched | 0.955      | 0.771     | 0.972   |

This table compares the maQUAST evaluation results for Scallop-LR, StringTie, and Iso-Seq Analysis on a mouse dataset. Metrics descriptions are the same as in Table S7.1.



**Table S8.7:** rnaQUAST evaluation results for mouse dataset SAMEA3374581, comparing Scallop-LR, StringTie, and Iso-Seq Analysis

| Metrics                             | Scallop-LR | StringTie | Iso-Seq |
|-------------------------------------|------------|-----------|---------|
| # Transcripts                       | 9851       | 20349     | 5765    |
| Aligned                             | 9851       | 20348     | 5765    |
| Uniquely aligned                    | 9848       | 20157     | 5759    |
| Unaligned                           | 0          | 1         | 0       |
| Misassemblies                       | 2          | 2         | 0       |
| 0-50% assembled isoforms            | 1199       | 4489      | 1252    |
| 50-75% assembled isoforms           | 1137       | 1932      | 743     |
| 75-95% assembled isoforms           | 1579       | 2038      | 1204    |
| 95-100% assembled isoforms          | 3680       | 5704      | 1695    |
| Mean isoform assembly               | 0.808      | 0.696     | 0.728   |
| 0-50% matched transcripts           | 221        | 1312      | 57      |
| 50-75% matched transcripts          | 418        | 1347      | 108     |
| 75-95% matched transcripts          | 1373       | 2690      | 384     |
| 95-100% matched transcripts         | 7792       | 12367     | 5166    |
| Unannotated                         | 44         | 2629      | 50      |
| Mean fraction of transcript matched | 0.944      | 0.772     | 0.964   |

This table compares the rnaQUAST evaluation results for Scallop-LR, StringTie, and Iso-Seq Analysis on a mouse dataset. Metrics descriptions are the same as in Table S7.1.

**Table S8.8:** rnaQUAST evaluation results for mouse dataset SAMEA3374582, comparing Scallop-LR, StringTie, and Iso-Seq Analysis

| Metrics                             | Scallop-LR | StringTie | Iso-Seq |
|-------------------------------------|------------|-----------|---------|
| # Transcripts                       | 8071       | 18712     | 4748    |
| Aligned                             | 8071       | 18712     | 4748    |
| Uniquely aligned                    | 8069       | 18543     | 4740    |
| Unaligned                           | 0          | 0         | 0       |
| Misassemblies                       | 1          | 1         | 0       |
| 0-50% assembled isoforms            | 1115       | 4837      | 1344    |
| 50-75% assembled isoforms           | 1081       | 1980      | 619     |
| 75-95% assembled isoforms           | 1335       | 1892      | 919     |
| 95-100% assembled isoforms          | 2718       | 4581      | 1187    |
| Mean isoform assembly               | 0.784      | 0.657     | 0.674   |
| 0-50% matched transcripts           | 98         | 1091      | 36      |
| 50-75% matched transcripts          | 243        | 1166      | 43      |
| 75-95% matched transcripts          | 905        | 2275      | 170     |
| 95-100% matched transcripts         | 6806       | 11737     | 4444    |
| Unannotated                         | 17         | 2439      | 55      |
| Mean fraction of transcript matched | 0.962      | 0.779     | 0.97    |

This table compares the rnaQUAST evaluation results for Scallop-LR, StringTie, and Iso-Seq Analysis on a mouse dataset. Metrics descriptions are the same as in Table S7.1.

**Table S9:** SRA information for the 26 datasets used in this study

| Dataset | BioSample      | SRA Study | Organism            | Year | Instrument |
|---------|----------------|-----------|---------------------|------|------------|
| 1       | SAMN00001694   | ERP015321 | <i>Homo sapiens</i> | 2016 | RS         |
| 2       | SAMN00001695   | ERP015321 | <i>Homo sapiens</i> | 2016 | RS         |
| 3       | SAMN00001696   | ERP015321 | <i>Homo sapiens</i> | 2016 | RS         |
| 4       | SAMN00006465   | ERP015321 | <i>Homo sapiens</i> | 2016 | RS         |
| 5       | SAMN00006466   | ERP015321 | <i>Homo sapiens</i> | 2016 | RS         |
| 6       | SAMN00006467   | ERP015321 | <i>Homo sapiens</i> | 2016 | RS         |
| 7       | SAMN00006579   | ERP015321 | <i>Homo sapiens</i> | 2016 | RS         |
| 8       | SAMN00006580   | ERP015321 | <i>Homo sapiens</i> | 2016 | RS         |
| 9       | SAMN00006581   | ERP015321 | <i>Homo sapiens</i> | 2016 | RS         |
| 10      | SAMN08182059   | SRP126849 | <i>Homo sapiens</i> | 2017 | RS II      |
| 11      | SAMN08182060   | SRP126849 | <i>Homo sapiens</i> | 2017 | RS II      |
| 12      | SAMN04563763   | SRP071928 | <i>Homo sapiens</i> | 2016 | RS II      |
| 13      | SAMN07611993   | SRP098984 | <i>Homo sapiens</i> | 2018 | RS II      |
| 14      | SAMN04169050   | SRP068953 | <i>Homo sapiens</i> | 2016 | RS II      |
| 15      | SAMN04251426.1 | SRP065930 | <i>Homo sapiens</i> | 2016 | RS II      |
| 16      | SAMN04251426.2 | SRP065930 | <i>Homo sapiens</i> | 2016 | RS II      |
| 17      | SAMN04251426.3 | SRP065930 | <i>Homo sapiens</i> | 2016 | RS II      |
| 18      | SAMN04251426.4 | SRP065930 | <i>Homo sapiens</i> | 2016 | RS II      |
| 19      | SAMEA3374575   | ERP010189 | <i>Mus musculus</i> | 2015 | RS         |
| 20      | SAMEA3374576   | ERP010189 | <i>Mus musculus</i> | 2015 | RS         |
| 21      | SAMEA3374577   | ERP010189 | <i>Mus musculus</i> | 2015 | RS         |
| 22      | SAMEA3374578   | ERP010189 | <i>Mus musculus</i> | 2015 | RS         |
| 23      | SAMEA3374579   | ERP010189 | <i>Mus musculus</i> | 2015 | RS         |
| 24      | SAMEA3374580   | ERP010189 | <i>Mus musculus</i> | 2015 | RS         |
| 25      | SAMEA3374581   | ERP010189 | <i>Mus musculus</i> | 2015 | RS         |
| 26      | SAMEA3374582   | ERP010189 | <i>Mus musculus</i> | 2015 | RS         |

This table summarizes the 26 datasets used in this paper. 18 datasets are human and eight datasets are mouse. The data were downloaded from the corresponding SRA Study. The multiple SRA Runs for each BioSample under the corresponding SRA Study were extracted, processed, and then merged into a large dataset.

**Table S10:** Performance comparison of Scallop-LR vs. Scallop on human data

| Datasets       | Sensitivity (%) |         | Precision (%) |         | # Total Multi-Exon Transcripts |         | # Correctly Predicted Known Transcripts |         |
|----------------|-----------------|---------|---------------|---------|--------------------------------|---------|-----------------------------------------|---------|
|                | Scallop-LR      | Scallop | Scallop-LR    | Scallop | Scallop-LR                     | Scallop | Scallop-LR                              | Scallop |
| SAMN00001694   | 5.50            | 5.38    | 38.47         | 34.57   | 24903                          | 27070   | 9580                                    | 9357    |
| SAMN00001695   | 5.36            | 5.29    | 42.96         | 36.82   | 21731                          | 25013   | 9336                                    | 9211    |
| SAMN00001696   | 4.48            | 4.48    | 47.29         | 41.01   | 16476                          | 19030   | 7791                                    | 7805    |
| SAMN00006465   | 5.32            | 5.36    | 46.28         | 40.69   | 20019                          | 22950   | 9264                                    | 9339    |
| SAMN00006466   | 5.05            | 5.05    | 48.42         | 38.91   | 18171                          | 22608   | 8798                                    | 8797    |
| SAMN00006467   | 4.62            | 4.58    | 50.57         | 39.95   | 15900                          | 19953   | 8040                                    | 7972    |
| SAMN00006579   | 5.19            | 5.13    | 43.52         | 35.87   | 20742                          | 24908   | 9027                                    | 8934    |
| SAMN00006580   | 4.87            | 4.81    | 45.89         | 35.43   | 18467                          | 23638   | 8474                                    | 8376    |
| SAMN00006581   | 5.09            | 5.07    | 43.31         | 35.03   | 20458                          | 25194   | 8861                                    | 8826    |
| SAMN08182059   | 5.29            | 5.13    | 36.34         | 31.37   | 25332                          | 28454   | 9206                                    | 8927    |
| SAMN08182060   | 5.52            | 5.41    | 43.59         | 36.01   | 22038                          | 26129   | 9606                                    | 9410    |
| SAMN04563763   | 4.87            | 4.92    | 46.90         | 41.09   | 18078                          | 20850   | 8478                                    | 8567    |
| SAMN07611993   | 7.60            | 7.53    | 28.97         | 27.02   | 45657                          | 48531   | 13226                                   | 13113   |
| SAMN04169050   | 6.86            | 6.63    | 30.90         | 25.72   | 38657                          | 44848   | 11946                                   | 11536   |
| SAMN04251426.1 | 5.70            | 5.57    | 29.32         | 28.25   | 33824                          | 34343   | 9916                                    | 9701    |
| SAMN04251426.2 | 5.76            | 5.66    | 29.92         | 28.83   | 33534                          | 34155   | 10034                                   | 9846    |
| SAMN04251426.3 | 5.81            | 5.75    | 30.09         | 29.42   | 33637                          | 33995   | 10122                                   | 10001   |
| SAMN04251426.4 | 5.78            | 5.67    | 30.59         | 29.32   | 32908                          | 33647   | 10065                                   | 9864    |

The above table compares the performance of Scallop-LR (v0.9.1) with the performance of Scallop (v0.10.3) using the Gffcompare evaluation. The same 18 human PacBio datasets as described in Table S1 were evaluated. The parameter settings (options) used for Scallop (v0.10.3) are “--max\_num\_cigar 1000” and “--min\_num\_hits\_in\_bundle 1”.

**Table S11:** Comparison of Scallop-LR with clustering vs. Scallop-LR without clustering on human data

| Datasets       | # Total Multi-Exon Transcripts |                               | # Correctly Predicted Known Transcripts |                               | % of Correctly Assembled Known Transcripts Missing Due to Clustering | % of Nearly Redundant Transcripts Removed by Clustering |
|----------------|--------------------------------|-------------------------------|-----------------------------------------|-------------------------------|----------------------------------------------------------------------|---------------------------------------------------------|
|                | Scallop-LR with Clustering     | Scallop-LR without Clustering | Scallop-LR with Clustering              | Scallop-LR without Clustering |                                                                      |                                                         |
| SAMN00001694   | 24903                          | 26853                         | 9580                                    | 9770                          | 1.94                                                                 | 10.3                                                    |
| SAMN00001695   | 21731                          | 23508                         | 9336                                    | 9479                          | 1.51                                                                 | 11.65                                                   |
| SAMN00001696   | 16476                          | 17695                         | 7791                                    | 7937                          | 1.84                                                                 | 11.0                                                    |
| SAMN00006465   | 20019                          | 21504                         | 9264                                    | 9452                          | 1.99                                                                 | 10.76                                                   |
| SAMN00006466   | 18171                          | 19513                         | 8798                                    | 8955                          | 1.75                                                                 | 11.22                                                   |
| SAMN00006467   | 15900                          | 17007                         | 8040                                    | 8157                          | 1.43                                                                 | 11.19                                                   |
| SAMN00006579   | 20742                          | 22229                         | 9027                                    | 9201                          | 1.89                                                                 | 10.08                                                   |
| SAMN00006580   | 18467                          | 19745                         | 8474                                    | 8622                          | 1.72                                                                 | 10.16                                                   |
| SAMN00006581   | 20458                          | 21994                         | 8861                                    | 9033                          | 1.9                                                                  | 10.52                                                   |
| SAMN08182059   | 25332                          | 27415                         | 9206                                    | 9340                          | 1.43                                                                 | 10.78                                                   |
| SAMN08182060   | 22038                          | 24449                         | 9606                                    | 9793                          | 1.91                                                                 | 15.17                                                   |
| SAMN04563763   | 18078                          | 19493                         | 8478                                    | 8634                          | 1.81                                                                 | 11.59                                                   |
| SAMN07611993   | 45657                          | 50082                         | 13226                                   | 13549                         | 2.38                                                                 | 11.23                                                   |
| SAMN04169050   | 38657                          | 43806                         | 11946                                   | 12188                         | 1.99                                                                 | 15.52                                                   |
| SAMN04251426.1 | 33824                          | 36534                         | 9916                                    | 10083                         | 1.66                                                                 | 9.61                                                    |
| SAMN04251426.2 | 33534                          | 36225                         | 10034                                   | 10234                         | 1.95                                                                 | 9.58                                                    |
| SAMN04251426.3 | 33637                          | 36190                         | 10122                                   | 10283                         | 1.57                                                                 | 9.23                                                    |
| SAMN04251426.4 | 32908                          | 35450                         | 10065                                   | 10287                         | 2.16                                                                 | 9.22                                                    |

The above table compares the results of Scallop-LR without post-assembly clustering with the results of Scallop-LR with post-assembly clustering (using the default “--max\_cluster\_intron\_distance”) by using the Gffcompare evaluation. The same 18 human PacBio datasets as described in Table S1 were evaluated. The percentages are computed as the following:

“% of Correctly Assembled Known Transcripts Missing Due to Clustering” =  $100 \times ((\text{“\# matching transcripts without clustering”} - \text{“\# matching transcripts with clustering”}) / \text{“\# matching transcripts without clustering”})$ .

“% of Nearly Redundant Transcripts Removed by Clustering” =  $100 \times ((\text{“\# non-matching transcripts without clustering”} - \text{“\# non-matching transcripts with clustering”}) / \text{“\# non-matching transcripts without clustering”})$ .

Where “# non-matching transcripts” = “# Total Multi-Exon Transcripts” – “# matching transcripts”;  
“# matching transcripts” = “# Correctly Predicted Known Transcripts”.

**Table S12:** Simulated Human Data: Sensitivity, Precision, Correctly Predicted Known Transcripts, and Total Multi-Exon Transcripts of Scallop-LR and StringTie

| Dataset                   | Sensitivity (%) |           | Precision (%) |           | # Total Multi-Exon Transcripts |           | # Correctly Predicted Known Transcripts |           |
|---------------------------|-----------------|-----------|---------------|-----------|--------------------------------|-----------|-----------------------------------------|-----------|
|                           | Scallop-LR      | StringTie | Scallop-LR    | StringTie | Scallop-LR                     | StringTie | Scallop-LR                              | StringTie |
| Simulated Human CCS Reads | 53.05           | 45.03     | 66.54         | 63.51     | 6226                           | 5538      | 4143                                    | 3517      |

This table compares the Gffcompare evaluation results for Scallop-LR and StringTie on a simulated human dataset (Liu *et al.*, 2019). The transcriptome that was used to generate the simulated long reads originated from the Ensembl annotation *Homo sapiens* GRCh38.94 and was a subset of the transcripts in this Ensembl annotation, by removing unfinished scaffolds, transcripts shorter than 200 bp, annotations with an unknown reference, etc. and randomly selecting alternative-splicing genes, single-splicing genes, and genes with small exons (< 31bp). The PacBio PBSIM tool was used to generate the simulated CCS reads from this transcriptome. The simulation was model-based using the CCS model, and three runs of simulations were performed by using three different sequencing depths 4X, 10X and 30X respectively. We merged the CCS reads generated with the three sequencing depths together to obtain this simulated human dataset. We used the transcripts in the transcriptome sequences that were used to generate the simulated CCS reads to extract the transcripts' records and their corresponding genes' records from the Ensembl annotation *Homo sapiens* GRCh38.94 to obtain an annotation GTF file. This extracted annotation GTF file serves as the reference in Gffcompare and the "ground truth", and it contains 7810 multi-exon transcripts.



**Table S13:** rnaQUAST evaluation results for a simulated human dataset, comparing Scallop-LR and StringTie

| Metrics                             | Scallop-LR | StringTie |
|-------------------------------------|------------|-----------|
| # Transcripts                       | 6228       | 7246      |
| Aligned                             | 6228       | 7246      |
| Uniquely aligned                    | 6225       | 7120      |
| Unaligned                           | 0          | 0         |
| Misassemblies                       | 0          | 0         |
| 0-50% assembled isoforms            | 90         | 41        |
| 50-75% assembled isoforms           | 171        | 48        |
| 75-95% assembled isoforms           | 253        | 170       |
| 95-100% assembled isoforms          | 3103       | 4248      |
| Mean isoform assembly               | 0.956      | 0.984     |
| 0-50% matched transcripts           | 107        | 41        |
| 50-75% matched transcripts          | 418        | 217       |
| 75-95% matched transcripts          | 1668       | 1039      |
| 95-100% matched transcripts         | 4027       | 4979      |
| Unannotated                         | 5          | 967       |
| Mean fraction of transcript matched | 0.924      | 0.81      |

This table compares the rnaQUAST evaluation results for Scallop-LR and StringTie on a simulated human dataset. The same simulated human dataset as described in Table S12 was evaluated. The same extracted annotation GTF file as described in Table S12 was used to generate the gene annotation database, which was used by rnaQUAST. Metrics descriptions are the same as in Table S7.1.
